# Supplementary material for: Detecting inbreeding depression for reproductive traits in Iberian pigs using genome-wide data
Source: PubMed Central journal article supplement (PMC4297446; doi:10.1186/s12711-014-0081-5), 2015-01-17

■  $F_{gen} - F_{roh\_long}$  \*  $F_{gen} - F_{snp}$   
△  $F_{gen} - F_{roh\_short}$  □  $F_{snp} - F_{roh\_long}$  ▲  $F_{snp} - F_{roh\_short}$

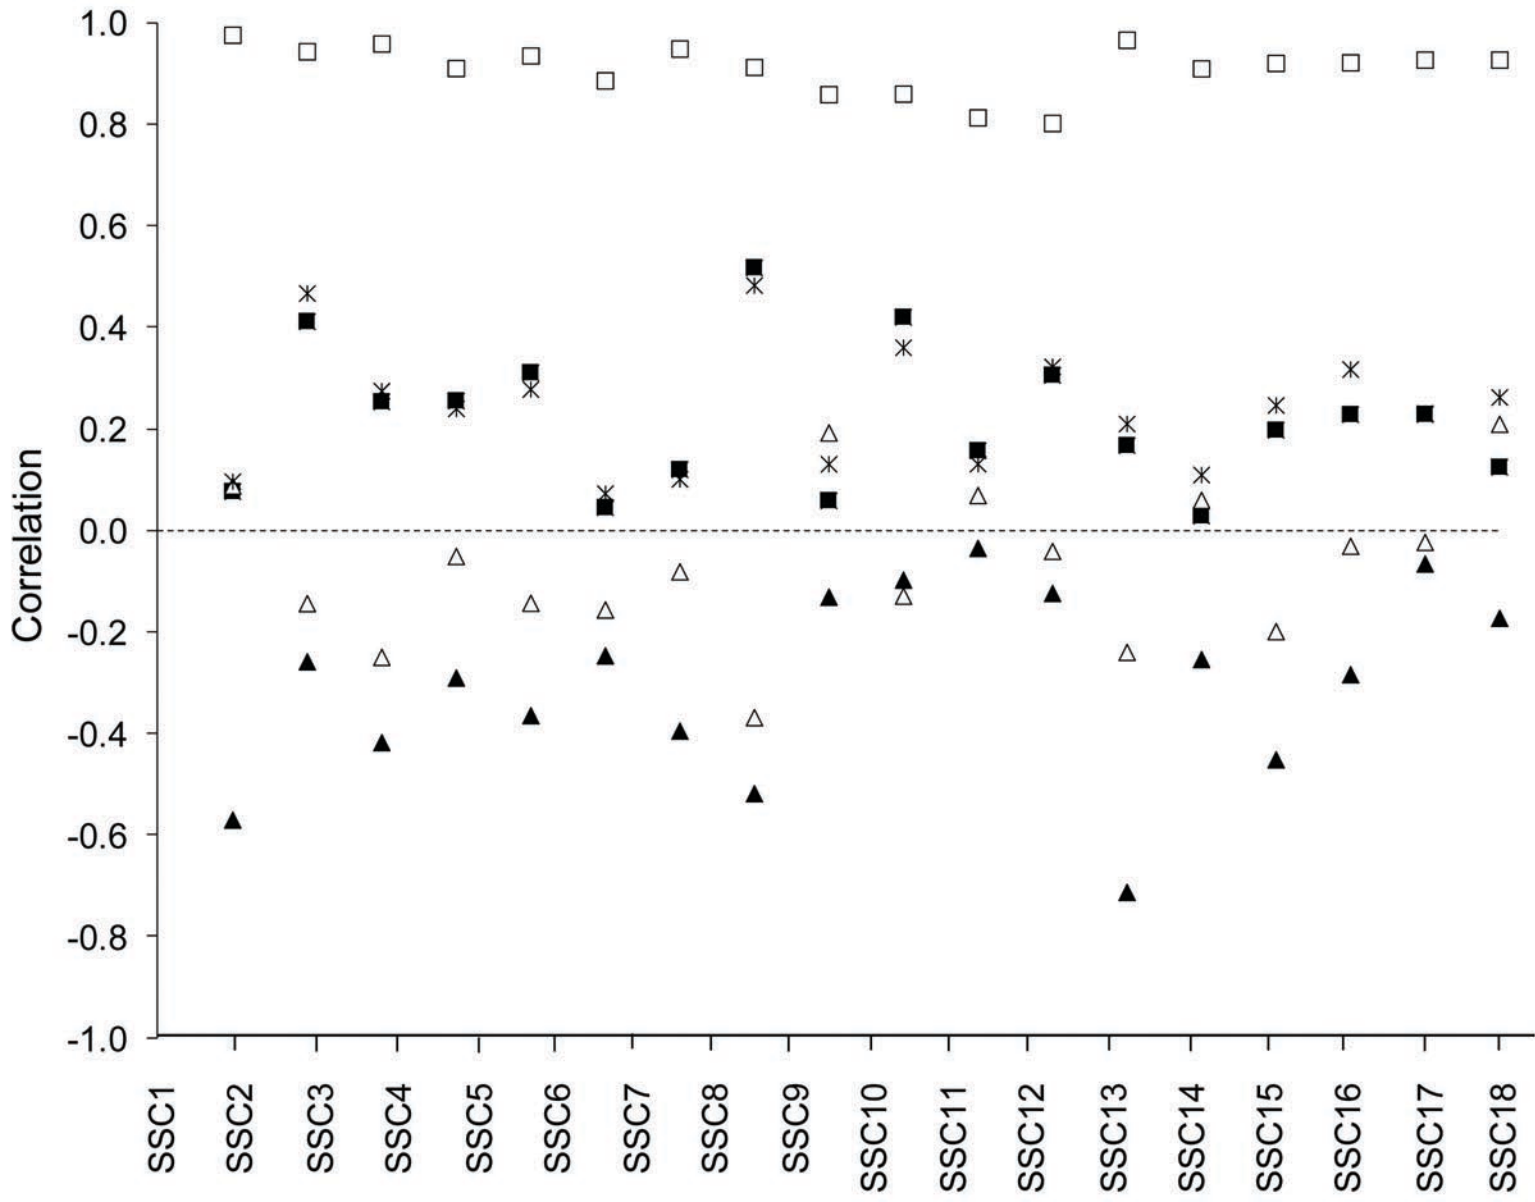

Supplement: 12711_2014_81_MOESM1_ESM.pdf [file 12711_2014_81_MOESM1_ESM.pdf]
