# Supplementary material for: Detecting inbreeding depression for reproductive traits in Iberian pigs using genome-wide data
Source: PubMed Central journal article supplement (PMC4297446; doi:10.1186/s12711-014-0081-5), 2015-01-17

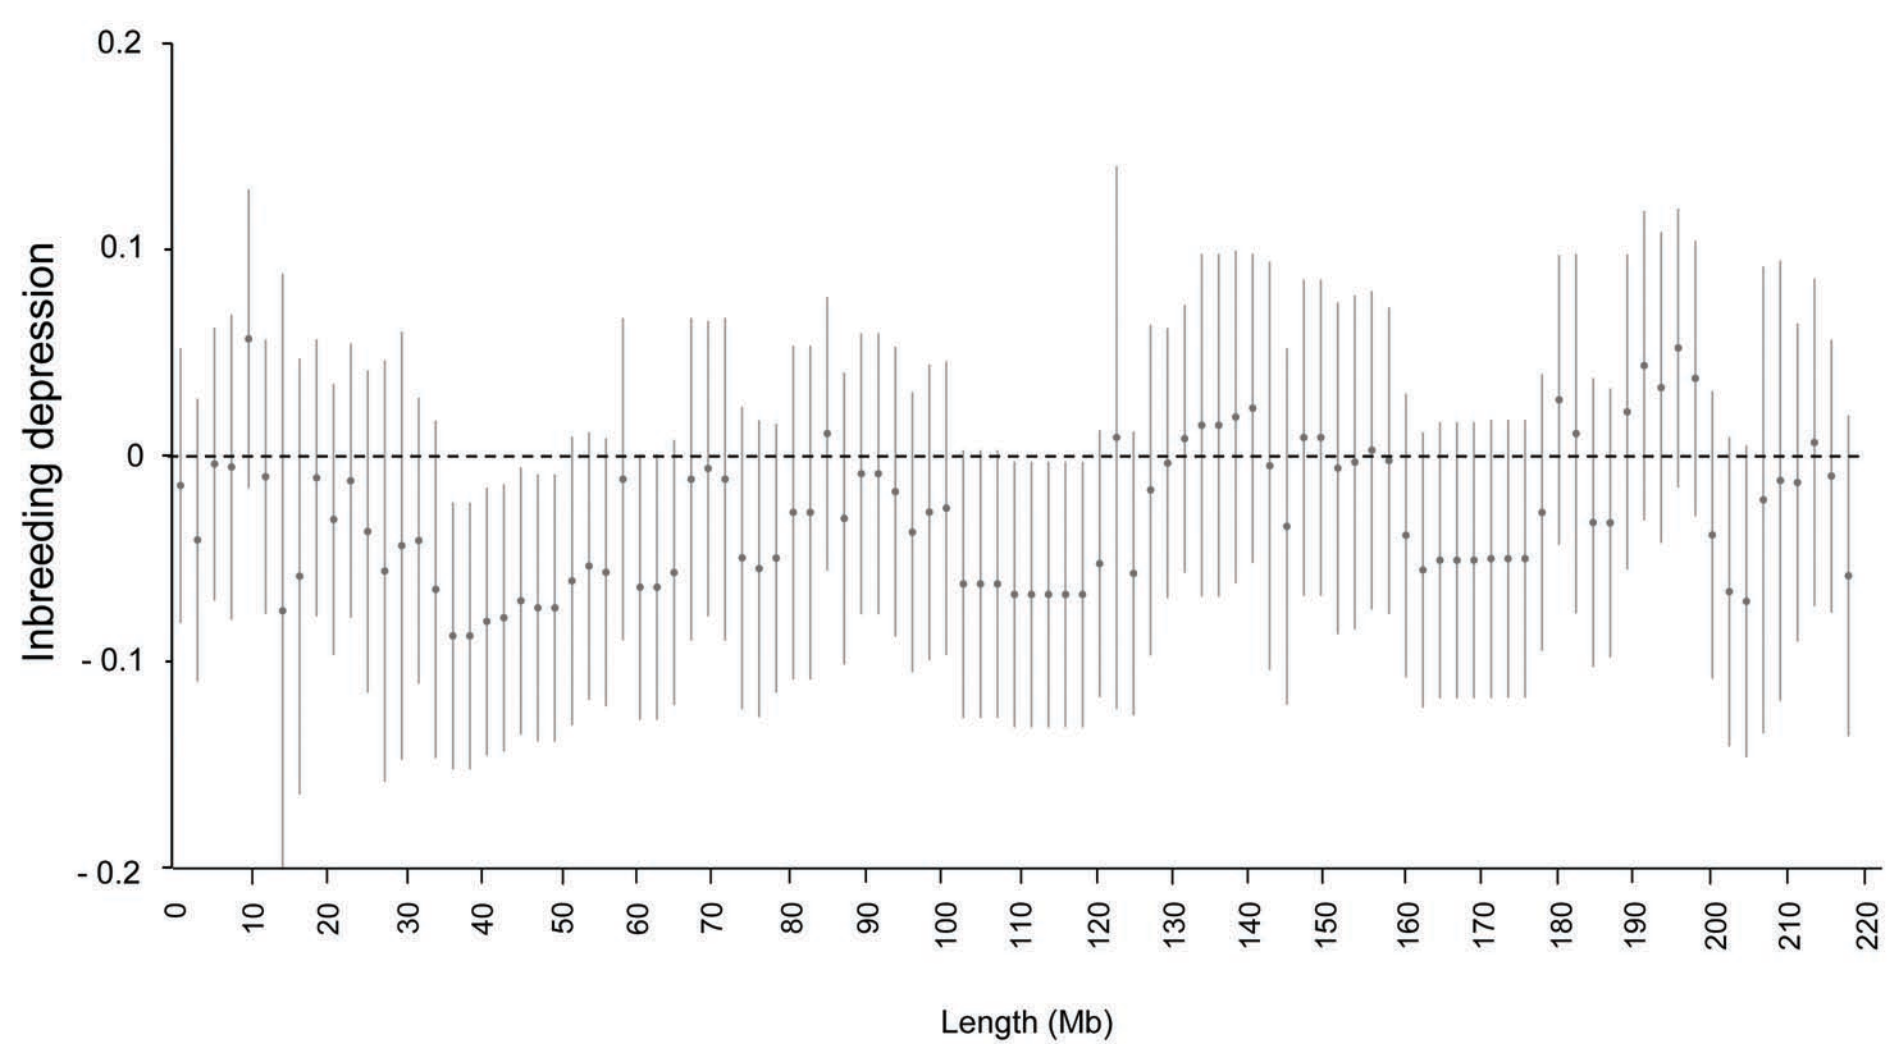

Supplement: 12711_2014_81_MOESM2_ESM.pdf [file 12711_2014_81_MOESM2_ESM.pdf]
